# Supplementary material for: Characterization of the Lipidomic Profile of Human Coronavirus-Infected Cells: Implications for Lipid Metabolism Remodeling upon Coronavirus Replication
Source: Viruses. 2019 Jan 16;11(1):73. doi: 10.3390/v11010073 (PMC6357182; doi:10.3390/v11010073)
Supplement: Supplementary file 1 [file viruses-11-00073-s001.pdf]

**Table S1.** Gradient elution program applied for UPLC-MS analysis.

| Time(min) | Flow rate<br>(ml/min-1 ) | Mobile phase<br>A(%) | Mobile phase<br>B(%) | Curve |
|-----------|--------------------------|----------------------|----------------------|-------|
| Initial   | 0.4                      | 99.5%                | 0.5%                 | 6     |
| 1         | 0.4                      | 99.5%                | 0.5%                 | 6     |
| 5         | 0.4                      | 65%                  | 35%                  | 6     |
| 23        | 0.4                      | 0.5%                 | 99.5%                | 6     |
| 26.5      | 0.4                      | 0.5%                 | 99.5%                | 6     |
| 27.5      | 0.4                      | 99.5%                | 0.5%                 | 6     |
| 30        | 0.4                      | 99.5%                | 0.5%                 | 6     |

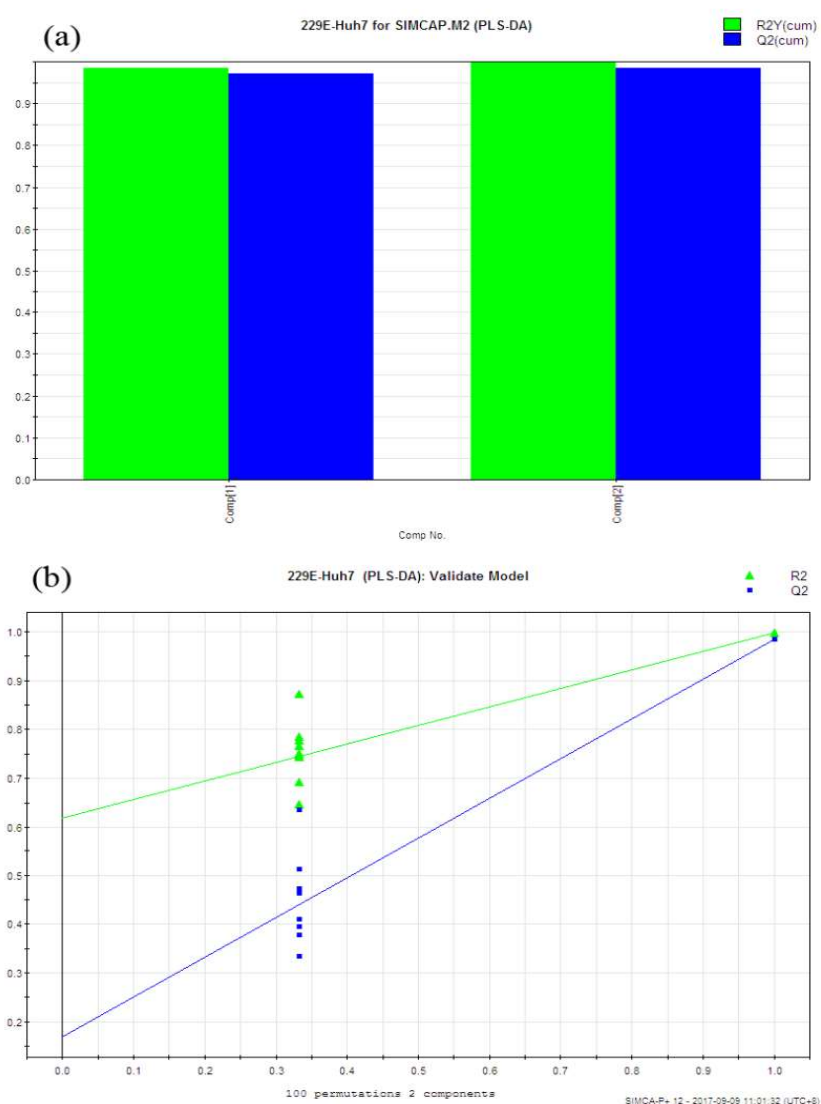

**Figure S1.** OPLS-DA model validation and permutation test. (a) The cross-validated parameters ( $R^2X=0.83$ ,  $R^2Y=0.98$ ,  $Q^2=0.97$ ) are satisfactory for the OPLS-DA model. (b) The permutation test (100 times) indicates that the validated model is acceptable.

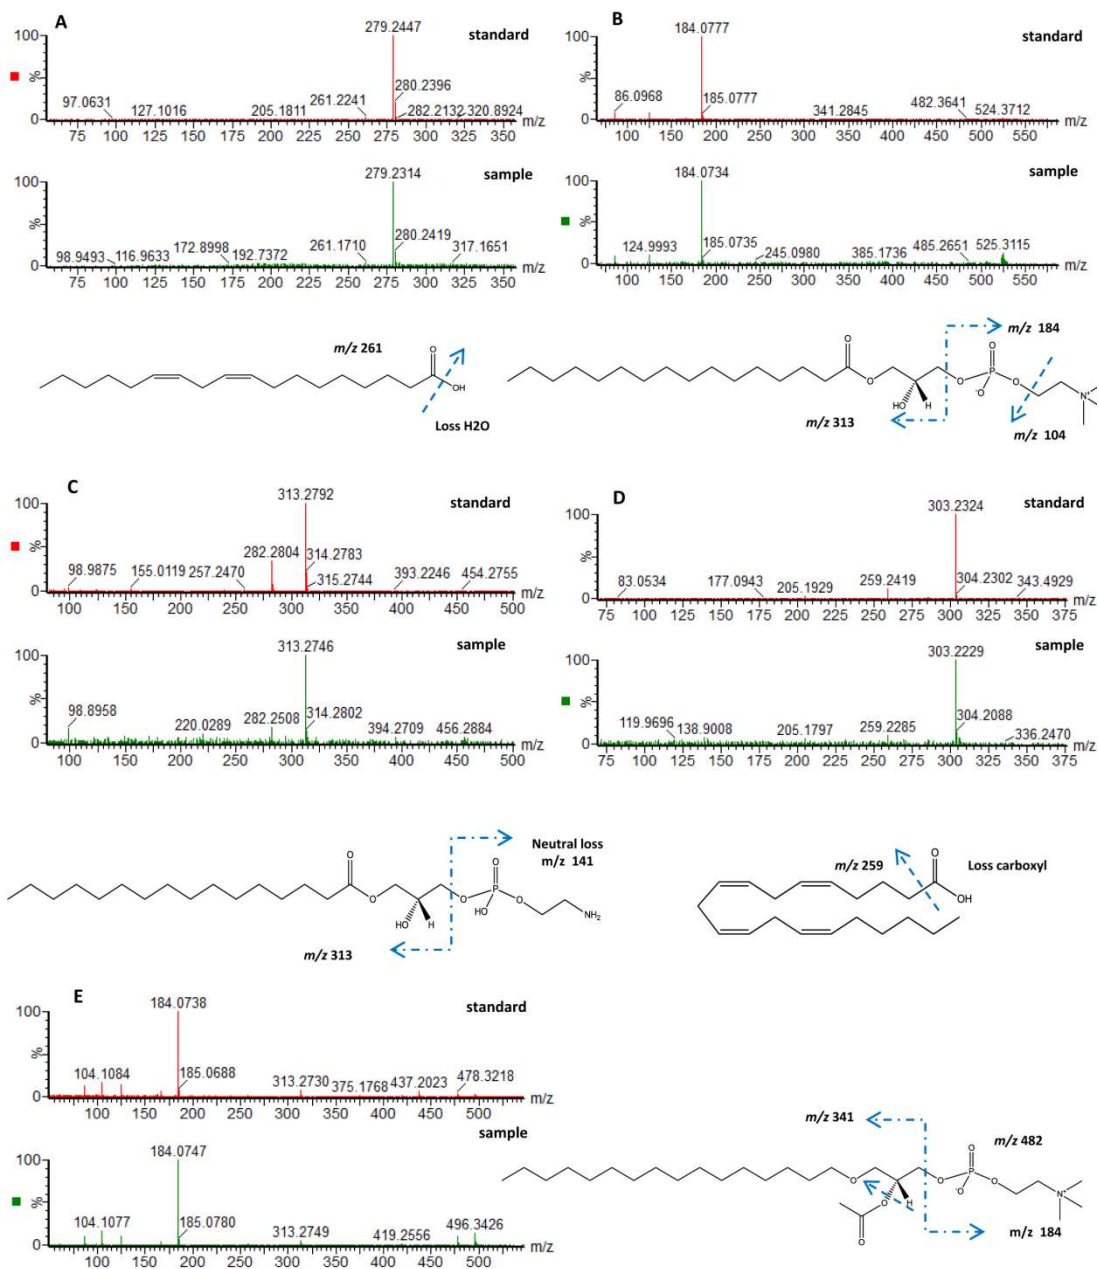

**Figure S2.** The MS/MS mass spectra and predicted structures with expected fragmentation profiles of the five representative lipids in cell lysate: (A) Linoleic acid; (B) LysoPC(16:0/0:0); (C) LysoPE(16:0/0:0); (D) Arachidonic acid; and (E) PAF C-16.
